# Supplementary material
Source: Research Square preprint supplement (doi:10.21203/rs.3.rs-9959531/v1)
Supplement: Supplementary file 1 [file 6714565450b989b287a2f106.docx]

**Supplementary Materials For**

Higher-Order Photon Correlation Imaging with Single-Photon Detector Arrays Enables Noise‑Blind Source Separation

Lei Zhang1,2,†, Yanqiang Guo1,2,3,†,*, Xiaoli Guo2, Li Zhang2, Yijie Zhao1,2, Mingjiang Zhang1,2,3,*, Liantuan Xiao1,2,*

1. Key Laboratory of Advanced Transducers and Intelligent Control System, Ministry

of Education, Taiyuan University of Technology, Taiyuan, China, 030024

2. College of Physics and Optoelectronics, Taiyuan University of Technology, Taiyuan,

China, 030024

3. Shanxi Key Laboratory of Precision Measurement Physics, Taiyuan University of Technology, Taiyuan, China, 030024

**†** These authors contributed equally to this work.

* Correspondence:

Yanqiang Guo: [guoyanqiang@tyut.edu.cn](mailto:guoyanqiang@tyut.edu.cn)

Mingjiang Zhang: [zhangmingjiang@tyut.edu.cn](mailto:zhangmingjiang@tyut.edu.cn)

Liantuan Xiao: [xlt@sxu.edu.cn](mailto:zhangmingjiang@tyut.edu.cn)

**Funding:**

National Key Research and Development Program of China (2022YFA1404201).

National Natural Science Foundation of China (62475185, 62175176, U23A20380).

Fundamental Research Program of Shanxi Province (202403021221034).

Central Guiding Fund for Local Science and Technology Development Project (YDZJSX2025D015).

**Table of contents:**

**Supplementary Note 1:** Pulse laser power testing

**Supplementary Note 2:** Analysis of SPDA characteristics

**Supplementary Note 3:** The measurement of Poisson distribution in coherent laser light

**Supplementary Note 4:** The measurement of the photon number probability distribution in the light modulated by CC-Hadamard masks

**Supplementary Note 5:** Comparison of photon number probability distributions for different mask modulation methods

**Supplementary Note 6:** Comparison of second-order coherence under different mask modulations

**Supplementary Note 7:** Theoretical simulations of the probability distribution model and second-order coherence

**Supplementary Note 8:** Measurement of light field coherence

**Supplementary Note 9:** Light source brightness

**Supplementary Note 10:** Dynamic range, contrast and SNR of higher-order correlation imaging

**Figures:** **1**–**9**.

**Equations: 1**–**13**.

**Supplementary Note 1: Pulse laser power testing**

To evaluate the output characteristics and operational stability of the pulsed laser source, we first characterized its power-current (P **–** I) response. By adjusting the driving current percentage of the laser, the corresponding average output power was measured (Fig. 1a). The results indicate that in the low driving current regime, the laser output power is relatively low and increases slowly; however, when the current is increased to the 60% **–** 100% range, the output power exhibits a pronounced linear growth with respect to the current. To further investigate the long-term operational stability of the light source, we recorded the temporal fluctuations of the output power under several specific current settings (*I* = 8%, 15%, 30% and 45%) (Fig. 1b). The measurements reveal that lower driving currents yield significantly smaller fluctuation amplitudes in the output power compared to higher current conditions. In this work, we set the operating current of the laser to 30%, yielding an average output power of approximately 0.861 mW. Under this setting, the power fluctuation remains minimal during extended continuous operation (> 3×103 s), demonstrating excellent output stability.


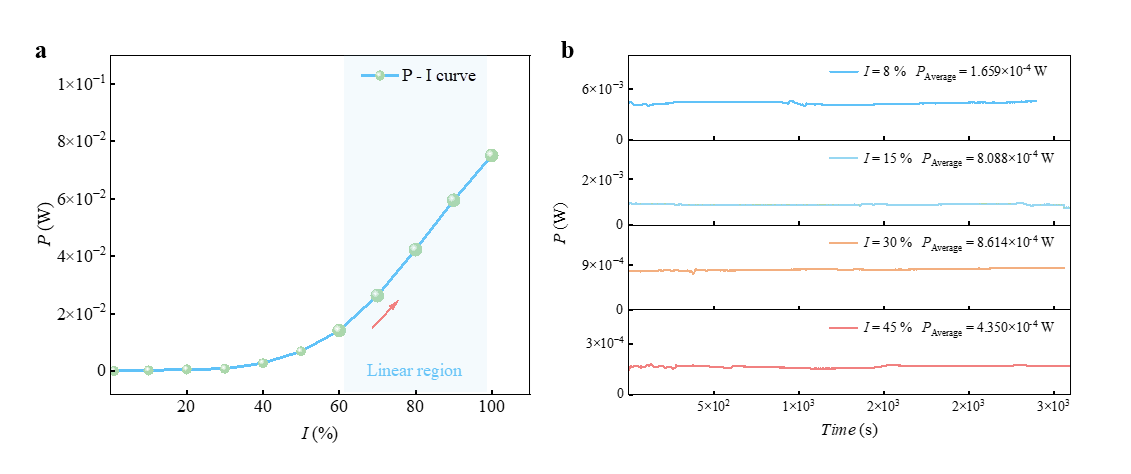


**Fig. 1.** Characteristic curves of the light source. **a** Average output power of the pulsed laser at varying current levels. **b** Temporal fluctuations of the output power under different current conditions.

**Supplementary Note 2: Analysis of SPDA characteristics**

To evaluate the imaging performance of the SPDA1-3, we systematically analyzed the dependence of the dark count rate (DCR), signal-to-noise ratio (SNR), and dynamic range (DR) on exposure time under various bit-depth modes. As illustrated in Fig. 2a, the DCR exhibits an upward trend with increasing exposure time across all bit modes. Furthermore, higher bit-depths intrinsically introduce elevated DCR levels, with the SPDA demonstrating the highest DCR when operating in the 12-bit mode. Fig. 2b reveals a rapid degradation in SNR as the exposure time increases. The prolonged integration process accumulates background noise and dark counts, which deteriorates the SNR — a phenomenon particularly pronounced in the 10-bit mode. Conversely, the DR demonstrates logarithmic growth with extending exposure time before gradually reaching saturation. Higher bit modes offer a distinct advantage in expanding the dynamic range. As shown in Fig. 2c, when operating in the 10-bit mode with an exposure time of 400 µs, the SPDA achieves a DR exceeding 140 dB.


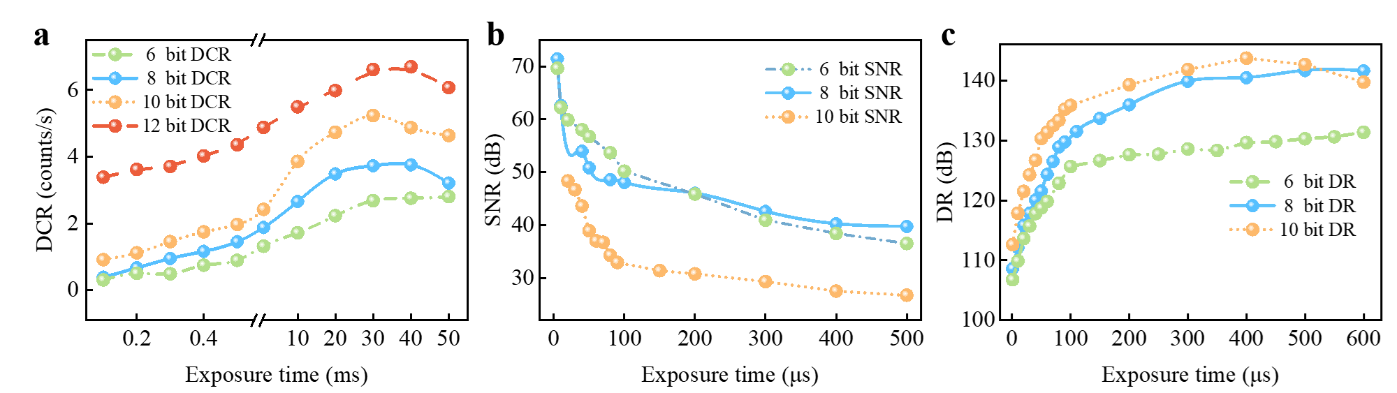


**Fig. 2.** Performance of single-photon detection array at different bit depths. **a** DCR - exposure time curves. **b** SNR - exposure time results graph. **c** DR - exposure time results graph.

**Supplementary Note 3: The measurement of Poisson distribution in coherent laser light**

From a physical perspective, the formation of the Poisson distribution is directly related to the phase randomness of the light field. In a coherent laser, the stimulated emission process drives the light field towards a phase-locked state. However, due to the influence of spontaneous emission noise, there are still small phase fluctuations. When the measurement time is much greater than the coherence time of the laser, these random phase fluctuations cause the photon count to exhibit Poisson distribution characteristics. Based on this theory, we perform photon number statistical measurements using a single-photon detector array, with repeated measurements at different integration times to suppress statistical fluctuations. The measurement data are then subjected to maximum likelihood Poisson fitting, as shown in the Fig. 3. The experimental results are consistent with the theoretical Poisson distribution, in accordance with Glauber's quantum optical theory of photon statistics for coherent states. In the experimental verification, the Hanbury Brown–Twiss interference theory was used to calculate the zero-delay second-order coherence between different pixel pairs. When the average photon number , the measured . As increased, gradually approached 1, reaching at . This result aligns with the theoretical expectation of for a coherent light field.


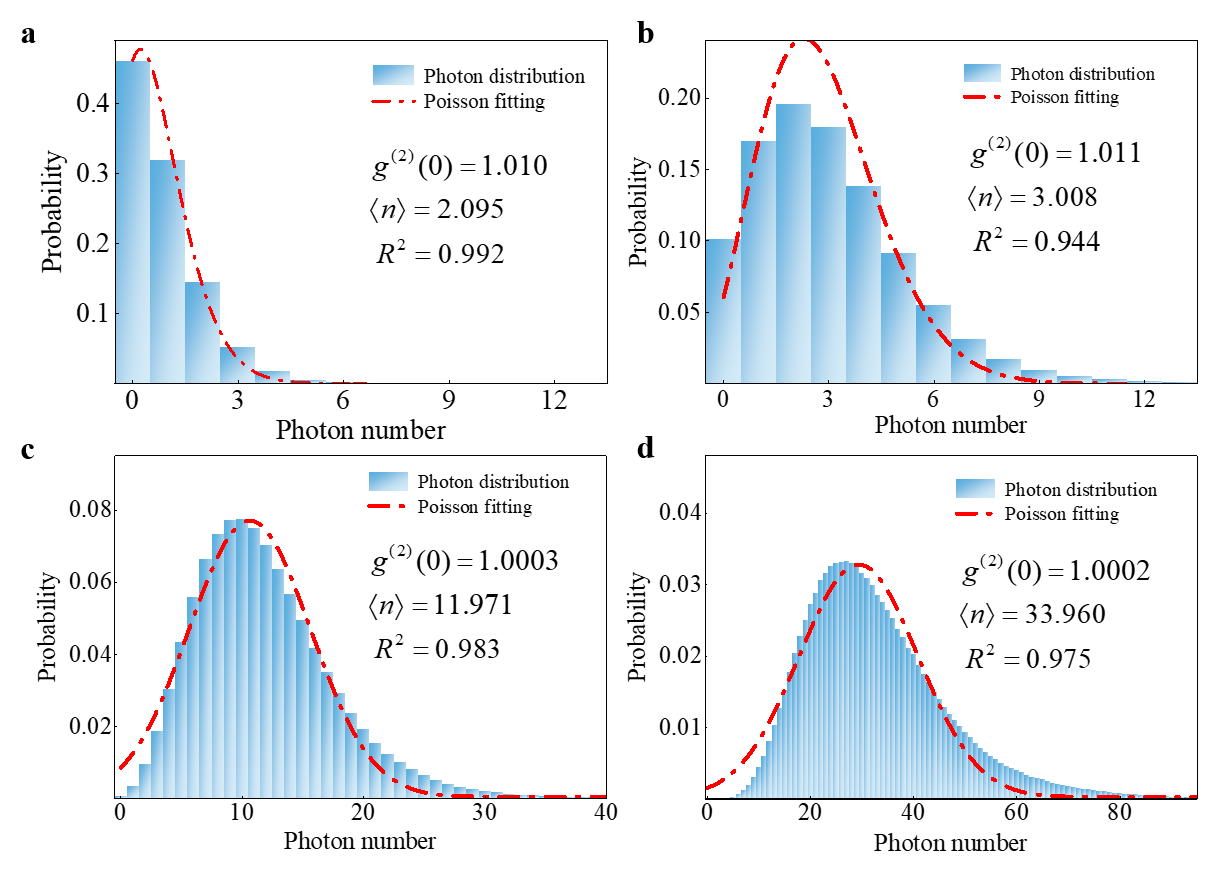


**Fig. 3.** The measurement of the Poisson distribution of coherent laser light. **a**-**d** Photon number probability distribution plots and their Poisson fitting curves under different : **a** . **b** . **c** . **d** .

**Supplementary Note 4: The measurement of the photon number probability distribution in the light modulated by CC-Hadamard masks**

Furthermore, the photon number probability distributions and of the CC-Hadamard-mask-modulated light field were measured under varying exposure times. An extended exposure time causes the to decrease and converge toward 2, reflecting a gradual transition of the light field's statistical properties from super-thermal light back to thermal light (Fig. 4a).

To investigate the influence of the on the , we measured the of the CC-Hadamard-mask-modulated light field under varying mean photon numbers. The results demonstrate that at, the measured reaches as 4.84. Furthermore, as increases, the exhibits a decreasing trend, gradually converging toward the second-order coherence limit of a thermal light (Fig. 4b).

To further investigate the photon statistical distribution characteristics of the CC-Hadamard -mask-modulated light field, we fitted the experimental data using a power-law distribution (dashed blue line) and a Bose-Einstein distribution (dashed red line), respectively. The results indicate that at , the coefficient of determination for the Bose-Einstein fit of the CC-Hadamard-mask-modulated field reaches 0.961, significantly outperforming the power-law fit (). This demonstrates that the photon-number probability distribution of the CC-Hadamard modulated light field can be more accurately described by the Bose-Einstein distribution model (Fig. 4c).


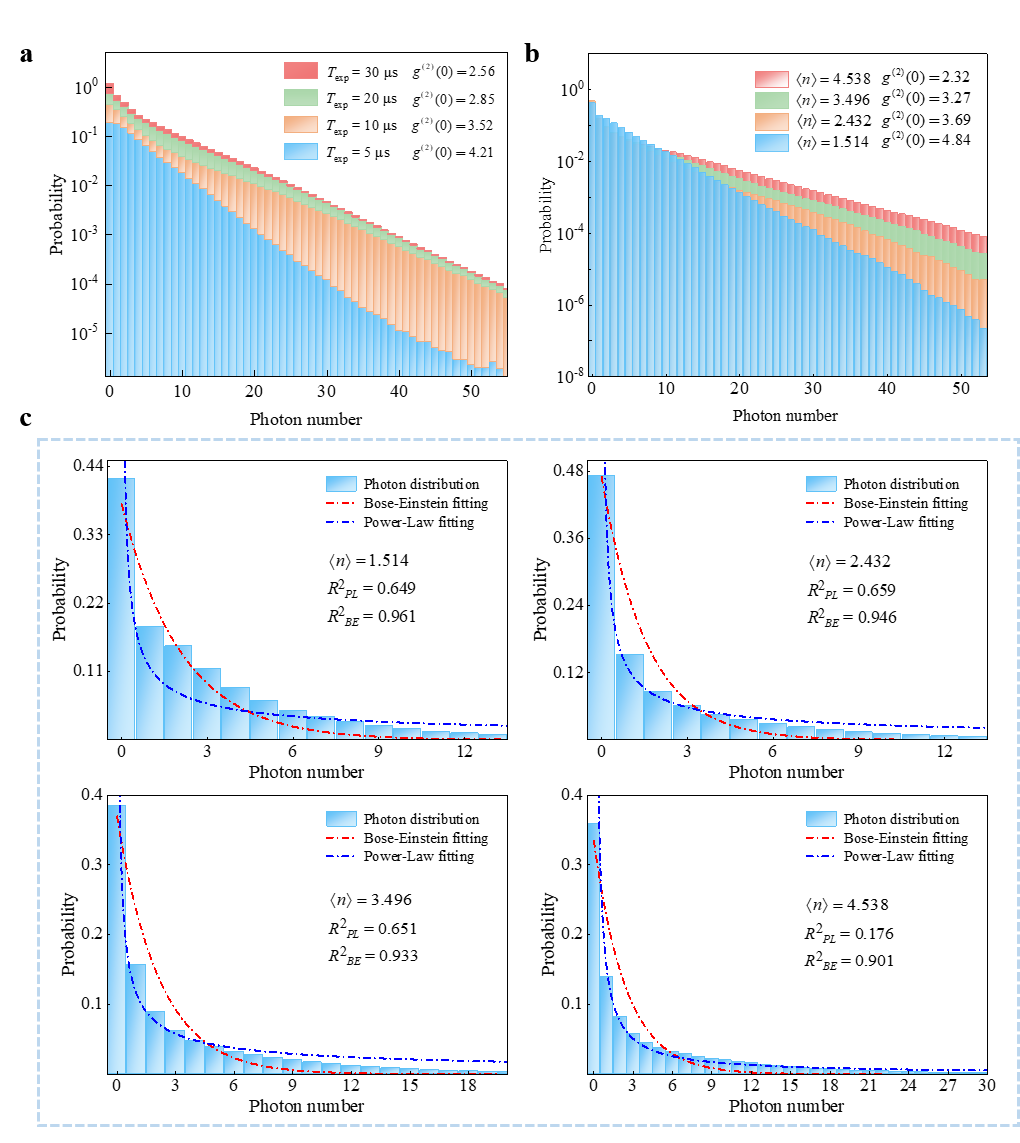


**Fig. 4.** Measurement of the photon-number probability distribution and for the CC-Hadamard mask-modulated light field. **a** Photon-number probability distributions and of the CC-Hadamard mask-modulated light field at different (exposure times), plotted on a semi-logarithmic scale. **b** Photon-number probability distributions and of the CC-Hadamard mask-modulated light field under different , plotted on a semi-logarithmic scale. **c** Power-law and Bose-Einstein fitting curves of the CC-Hadamard mask-modulated light field under different .

**Supplementary Note 5: Comparison of photon number probability distributions for different mask modulation methods**

We characterized the photon number probability distributions for the unmodulated coherent laser, the CC-Hadamard-mask modulated light field, and the random-mask modulated light field (Fig. 5a, b). Furthermore, a comparative analysis of the photon statistics between the two modulated light fields was performed across a range of exposure times (5 μs, 10 μs, 20 μs and 30 μs). Experimental results demonstrate that the unmodulated coherent laser light follows a standard Poisson distribution, with its probability peak occurring near the average photon number. Upon modulation by the two types of masks, the light field distributions exhibit distinct long-tail characteristics. Specifically, the light field modulated by the CC-Hadamard mask conforms to a Bose-Einstein distribution (Fig. 5c), whereas the field modulated by the random mask follows a power-law distribution (Fig. 5d). As the exposure time increases from 5 μs to 30 μs, the probability of zero-photon detection exhibits a clear downward trend.


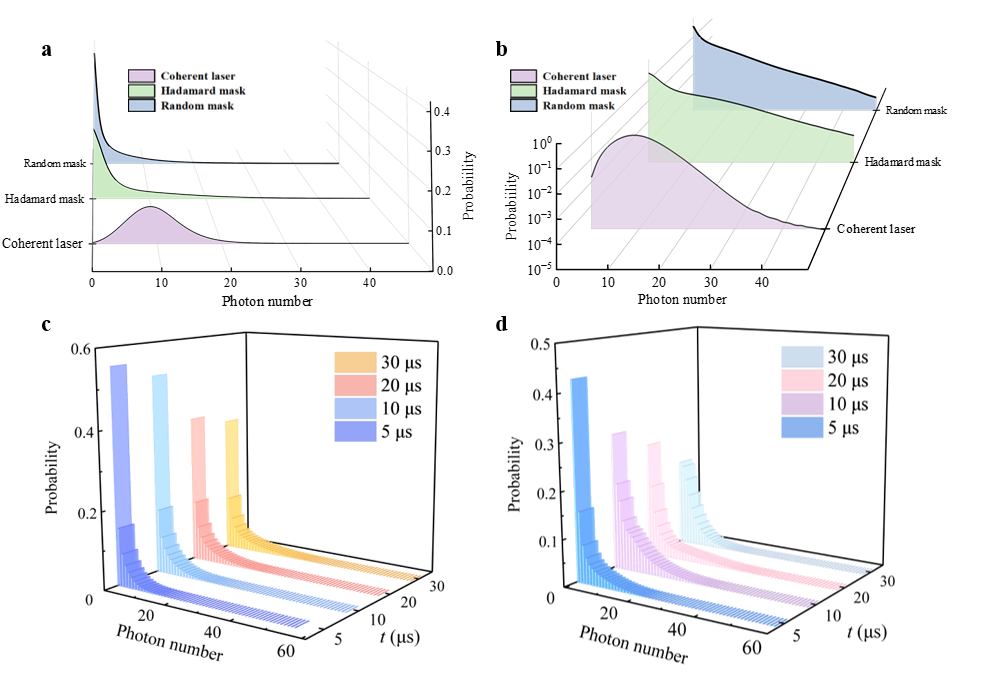


**Fig. 5.** Comparison of photon number probability distributions under different mask modulation methods. **a** Comparison of photon number probability distributions for unmodulated coherent laser light, random-mask modulated light, and CC-Hadamard-mask modulated light. **b** Fig. a is plotted on a semi-logarithmic scale. **c** Photon number probability distributions of light fields modulated by CC-Hadamard masks under various exposure times. **d** Corresponding results for the light field modulated by random masks.

**Supplementary Note 6: Comparison of second-order coherence under different mask modulations**

Fig. 6a illustrates the variations in the average second-order degree of coherence4-5 for three types of light fields within an exposure time range of 5-100 μs. The results demonstrate that the average second-order coherence of the coherent laser remains stable near unity. In contrast, the average second-order coherence for both the CC-Hadamard and random mask modulated light fields exhibits a downward trend as the exposure time increases. Notably, the random mask modulation significantly outperforms the CC-Hadamard configuration in terms of coherence enhancement; even as the exposure time is extended to 100 μs, it maintains a high value of 2.25.

Fig. 6b illustrates the dependence of the average second-order degree of coherence on for the light fields modulated by random dynamic masks and CC-Hadamard masks, as well as for the unmodulated light field. The results demonstrate that the average second-order coherence of the coherent laser remains consistently stable near unity. As increases, the average second-order coherence for both mask-modulated light fields exhibits a gradual downward trend. Specifically, the CC-Hadamard mask modulation enhances the average second-order coherence to a peak value exceeding 2.85. In comparison, the random mask modulation achieves a more significant enhancement, with the peak average second-order coherence reaching 3.95.

For the light field modulated by random masks, which exhibit superior modulation performance, we investigated the two-dimensional distribution of the average second-order degree of coherence under the synergistic control of integration time (5-100 μs) and mask repetition frequency (0.5-180 Hz). The results indicate that both the extension of the integration time and the reduction of the repetition frequency drive the average second-order degree of coherence toward unity. This trend reflects a gradual transition of the light field’s statistical properties from a thermal state back toward a coherent state. Furthermore, it is demonstrated that effective regulation of the enhancement magnitude in second-order coherence can be achieved by tuning the integration time and modulation frequency, as illustrated in Fig. 6c.


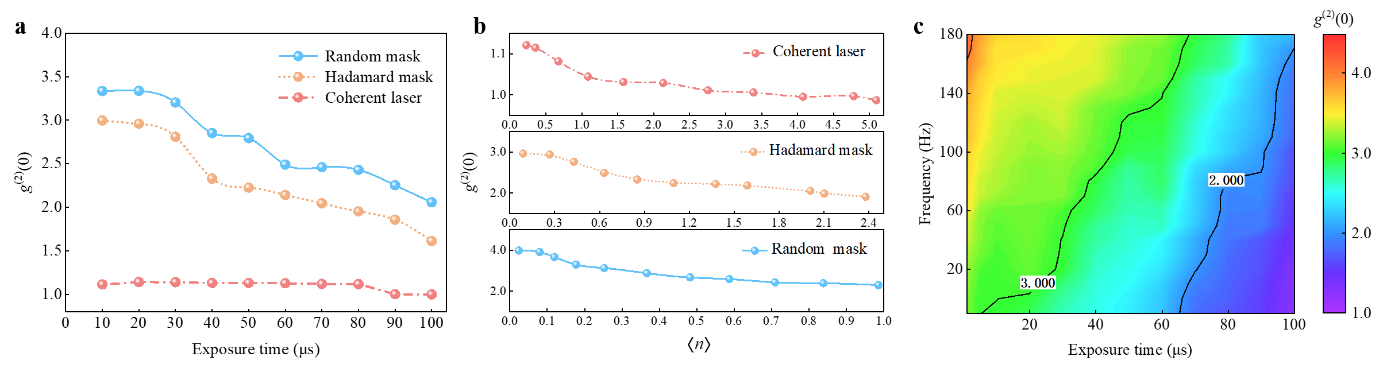


**Fig. 6.** Comparison of the second-order degree of coherence for coherent laser light under three conditions: unmodulated, CC-Hadamard-mask modulated, and random-mask modulated. **a** The curves of the average second-order coherence of the light field in the imaging area varying with exposure time under three modulations. **b** The curve of the average second-order coherence of the light field with under the three modulations. **c** Two-dimensional distribution of the second-order degree of coherence as a function of integration time and modulation frequency under random mask modulation of a coherent light field.

**Supplementary Note 7: Theoretical simulations of the probability distribution model and second-order coherence**

The random dynamic mask loaded on a digital micromirror device (DMD) enables spatiotemporal modulation of the incident coherent light field. It introduces phase and amplitude perturbations with spatiotemporal randomness into the wavefront, causing the spatial distribution of the secondary wave sources — formed by the micromirrors in the "ON" state — to exhibit temporally disordered and random variations. As this light field propagates in free space, the various secondary wavefronts undergo diffraction and interference due to the mask's randomness, generating a dynamic speckle field. Simultaneously, the spatial long-range disorder introduced by the mask facilitates interference throughout the entire modulated region. Consequently, the light intensity at the detection plane exhibits a "heavy-tailed" statistical characteristic, with the photon number statistics following a power-law distribution:

(1)

where is the normalization constant, is the power-law exponent, is the generalized Riemann zeta function, and is the minimum photon number satisfying the power-law distribution.

Based on the "heavy-tailed" characteristic of the light field's power-law distribution, and combined with the definition of the second-order degree of coherence , by deriving the first-order moment and the second-order moment of the photon number, we obtain:

(2)

Meanwhile, within the framework of classical theory, an approximate relationship exists between and the relative variance of light intensity as follows: , where is the variance of the intensity fluctuations, and is the square of the mean intensity. The essence of enhancing lies in maximizing the intensity fluctuations . By introducing spatiotemporal long-range disorder, the random dynamic mask modulates the photon number of the light field into a power-law distribution. Subsequently, by amplifying the intensity fluctuations, it realizes a breakthrough in the second-order degree of coherence beyond the classical thermal light limit.

To verify the theoretical mechanism described above, we further conducted numerical simulations. Fig. 7a presents the theoretical probability distribution curves for three typical photon number distributions — Poisson distribution, Bose-Einstein distribution, and power-law distribution — under the condition of a mean photon number . Fig. 7b shows the theoretical evolution curve of the second-order degree of coherence with respect to the time delay , corresponding to a power-law distribution exponent of .


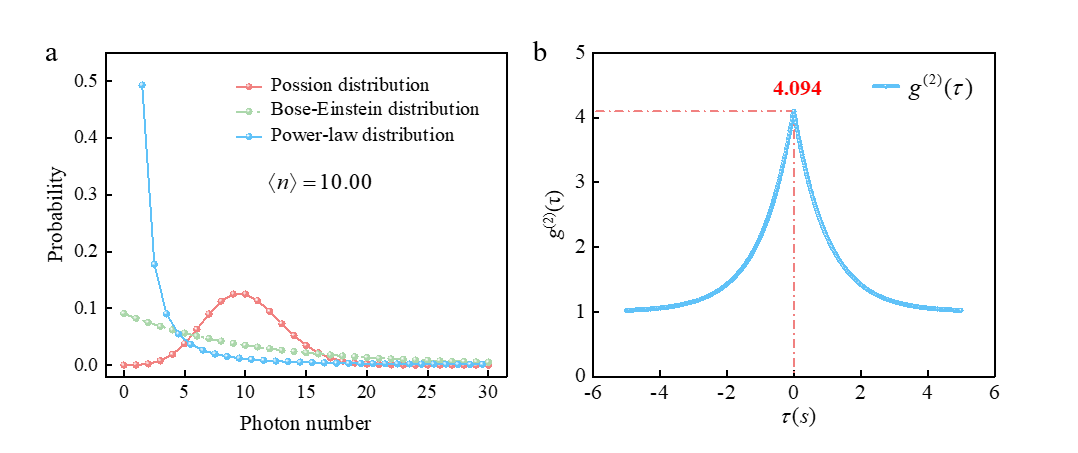


**Fig. 7.** Numerical verification of the theoretical mechanism. **a** Theoretical probability distribution curves for three typical photon number statistics — Poisson distribution, Bose-Einstein distribution, and power-law distribution — under the condition of . **b** Theoretical evolution curves of the second-order degree of coherence as a function of time delay , corresponding to a power-law distribution with an exponent .

**Supplementary Note 8: Measurement of light field coherence**

The traditional interference theory is based on Young's double-slit interference experiment, which investigates the first-order coherence of the light field. Light emitted from a quasi-monochromatic source is split by two small apertures, and , on the plane . At time , the positive frequency part of the light field at point on the plane can be approximated by the linear superposition of the field operators at earlier times at points and , as given by:

(3)

Where is the time required for light to travel from aperture to point , and and are the position vectors at apertures and , respectively. The coefficients and depend on the geometry and size of the apertures.

The first-order correlation function of the light intensity measured by a photodetector at point is given by:

(4)

For a statistically steady field, the expression for the average intensity at point is given by:

(5)

Where , so the average intensity is independent of time. The first two terms in the equation represent the average intensity at point due to the light fields from apertures and , respectively, while the last term is the interference term between the two light fields. , according to Glauber's definition of coherence, the normalized first-order correlation function is given by:

(6)

Where is used to measure the coherence of the light field. When , the interference fringes disappear, indicating that the two beams of light arriving at point are completely incoherent. When , the contrast of the interference fringes is maximized, meaning the two beams are fully coherent. When , the light field is partially coherent.

However, the first-order correlation function cannot distinguish light fields with identical spectral characteristics. To more effectively differentiate light fields, the second-order correlation function is introduced. The normalized second-order correlation function at position is expressed as:

(7)

The second-order correlation function of a coherent state shows a Poisson photon number distribution. When and , it indicates that the light field exhibits photon anti-bunching statistical effects, with a sub-Poissonian photon number distribution, representing a non-classical state where photons tend to be emitted individually, manifesting as a dispersed pattern in the time series. If and , it suggests that the light field is incoherent or the photons are indistinguishable, exhibiting photon bunching statistical effects, and the time series shows a clustered pattern.

Combining the HBT correlation measurement with single-photon detector technology allows for an accurate reflection of the photon statistical properties of the light field and the dynamical generation process of the light source. The second-order coherence obtained from the HBT correlation measurement can be used to assess the intensity correlations and quantum properties of the light field, and the zero-delay second-order coherence can distinguish different light fields. The light field modulated by the DMD was measured to have a second-order coherence , exhibiting a pronounced superbunching effect.

Although the second-order correlation function is sufficient to distinguish different light fields, higher-order correlation functions are needed to study more photon statistical properties. The higher-order correlation function is expressed as:

(8)

To obtain higher-order photon correlation imaging, it is necessary to measure the joint photon number probability distribution in typical multiphoton counting experiments. By normalizing the above expression, the higher-order coherence can be obtained, as expressed in the following equation:

(9)

**Supplementary Note 9: Light source brightness**

To characterize the source brightness received by the detector array per unit spectral bandwidth, we define the source brightness *E*, as follows:

(10)

where is the mean number of photons per pixel per exposure, and denote the number of row and column pixels of the detector array, respectively, is the exposure time, and represents the spectral bandwidth of the laser source. In this work, the imaging exposure time is 5 μs, the total number of pixels in the detector array is 262,144, and the spectral bandwidth of the laser source is 0.3 nm. When , the measured source brightness received by the detector array reaches 1.22 GHz/nm. The variation of light source brightness with exposure time and average photon number is shown in Fig. 8.


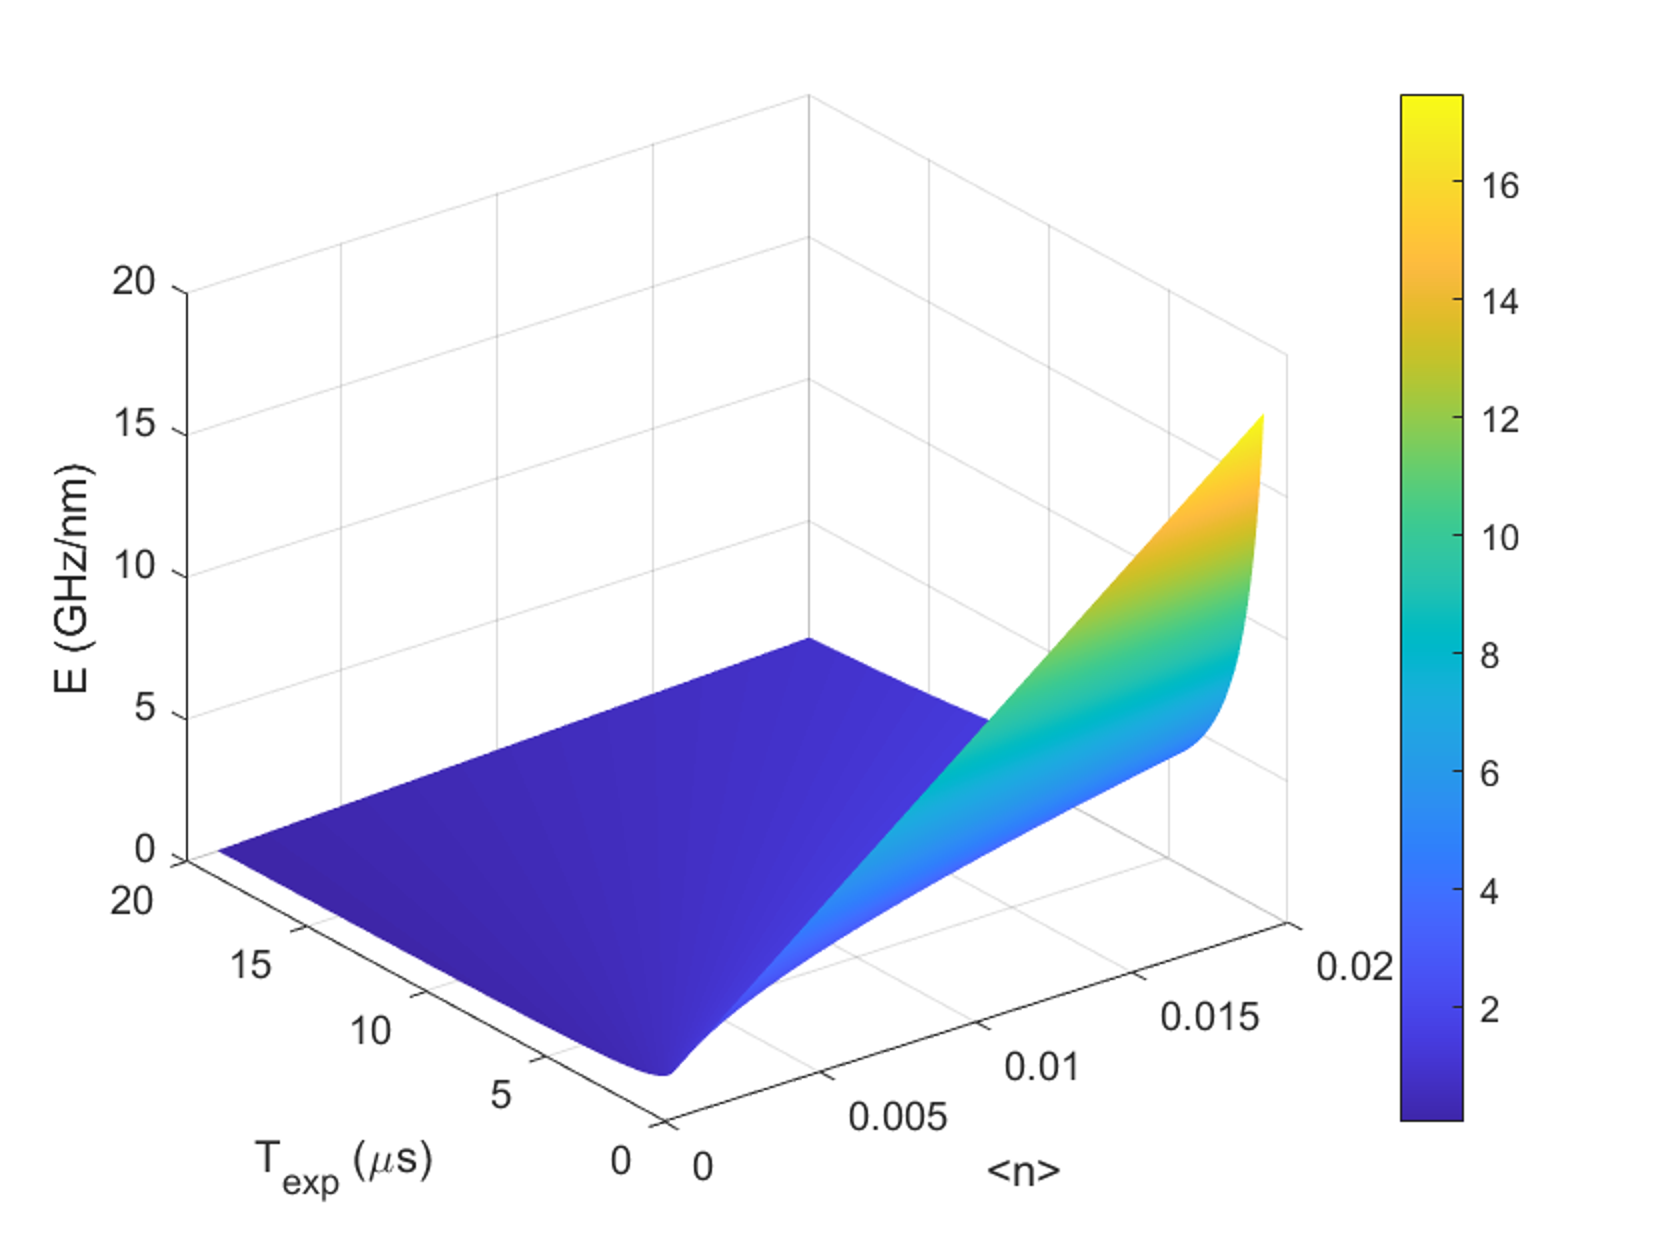


**Fig. 8.** Variation of Light Source Brightness with and .

**Supplementary Note 10: Dynamic range, contrast and SNR of higher-order correlation imaging**

Dynamic range (DR), contrast (CTRS) and signal-to-noise ratio (SNR) are used to quantify the imaging results. The typical dynamic range is defined by the following formula:

(11)

Where and denote the maximum and minimum brightness of the images acquired by the SPDA. When a DMD mask is introduced to modulate the optical field, the switching time and bit depth of dynamic modulation must be taken into account; therefore, the above dynamic-range formula requires modification. Let and represent the maximum and minimum durations during which the DMD micromirrors remain in the “on’’ state. Furthermore, let , denote the DMD control with n-bit depth, which is in this experiment. Under higher-speed modulation6, the dynamic range of the imaging system can thus be corrected as follows :

(12)

The contrast is employed to quantify the intensity discrepancy between the signal and background regions, serving as a robust indicator of the higher-order photon correlation imaging system's capabilities in target reconstruction and noise suppression under extreme environments. It is expressed as:

(13)

where represents the average higher-order coherence per pixel, and denotes the corresponding values for the background region.

Furthermore, the SNR for higher-order correlation imaging is defined as:

(14)

where represents the average higher-order coherence per pixel, and denotes the corresponding values for the background region, represents the variance of the higher-order coherence values in the background region.

We compared the SNR of three imaging approaches — second-order, fourth-order, and sixth-order correlation imaging — under different numbers of correlation frames. When the number of correlation frames is 110, the SNR of the sixth-order photon correlation imaging is 46.62 dB, which is improved by 24.6 dB compared with that of the second-order photon correlation image (Fig. 9).


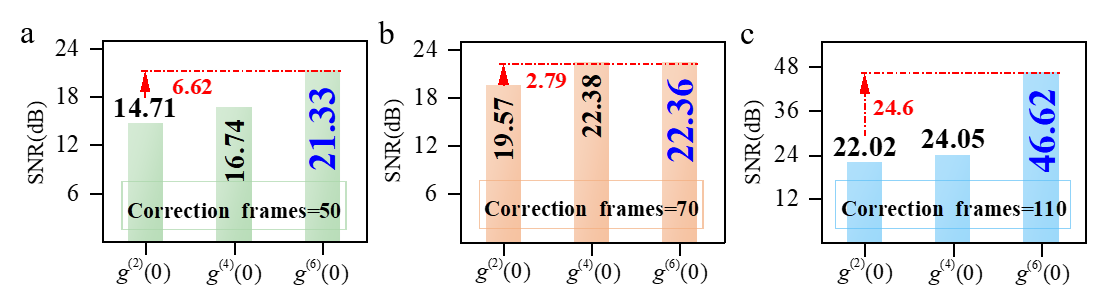


**Fig. 9.** Comparison of image SNR for the three imaging methods at different numbers of correlated frames.

**References**

1. Zhang, W., Huang, K., Wang, X., et al. Mid-infrared single-photon computational temporal ghost imaging. *Laser & Photonics Reviews* **19**, 2402180 (2025).

2. Bian, L., Song, H., Peng, L., et al. High-resolution single-photon imaging with physics-informed deep learning. *Nature Communications* **14**, 5902 (2023).

3. Pile, D. Megapixel single-photon camera. *Nature Photonics* **14**, 597-603 (2020).

4. Pilehvar, E., Amooghorban, E. & Moravvej-Farshi, M. K. The second-order coherence analysis of number state propagation through dispersive non-Hermitian multilayered structures. *Scientific Reports* **14**, 5399-5407 (2024).

5. Chen, X. et al. High-visibility, high-order lensless ghost imaging with thermal light. *Optics Letters* 35, 1166-1168 (2010).

6. Feng, W., Zhang, F. & Wang, W., et al. Adaptive high dynamic range imaging method and its application based on digital micromirror device. *Acta Physica Sinica* **66**, 127-135 (2017).
